RESEARCH ARTICLE

# Rivaroxaban administration after acute ischemic stroke: The RELAXED study

Masahiro Yasaka<sup>1\*</sup>, Kazuo Minematsu<sup>2</sup>, Kazunori Toyoda<sup>2</sup>, Etsuro Mori<sup>3</sup>, Teruyuki Hirano<sup>4</sup>, Toshimitsu Hamasaki<sup>2</sup>, Hiroshi Yamagami<sup>2</sup>, Takehiko Nagao<sup>5</sup>, Shinichi Yoshimura<sup>6</sup>, Shinichiro Uchiyama<sup>7</sup>, for the RELAXED study group<sup>†</sup>

**1** Department of Cerebrovascular Medicine and Neurology, Clinical Research Institute, National Hospital Organization Kyushu Medical Center, Fukuoka, Japan, **2** Departments of Cerebrovascular Medicine and Data Science, National Cerebral and Cardiovascular Center, Suita, Japan, **3** Department of Behavioral Neurology and Neuropsychiatry, United Graduate School of Child Development, Osaka University, Suita, Japan, **4** Department of Stroke and Cerebrovascular Medicine, Kyorin University, Tokyo, Japan, **5** Department of Neurology, Nippon Medical School, Tama-Nagayama Hospital, Tokyo, Japan, **6** Department of Neurosurgery, Hyogo College of Medicine, Hyogo, Japan, **7** International University of Health and Welfare Director, Center for Brain and Cerebral Vessels, Sanno Hospital and Sanno Medical Center, Tokyo, Japan

<sup>†</sup> Information for the members of the RELAXED study group are provided in the Acknowledgments.

\* [yasakamasahiro@gmail.com](mailto:yasakamasahiro@gmail.com)

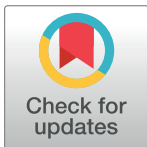

**OPEN ACCESS**

**Citation:** Yasaka M, Minematsu K, Toyoda K, Mori E, Hirano T, Hamasaki T, et al. (2019) Rivaroxaban administration after acute ischemic stroke: The RELAXED study. PLoS ONE 14(2): e0212354. <https://doi.org/10.1371/journal.pone.0212354>

**Editor:** Tomohiko Ai, Indiana University, UNITED STATES

**Received:** October 10, 2018

**Accepted:** January 31, 2019

**Published:** February 13, 2019

**Copyright:** © 2019 Yasaka et al. This is an open access article distributed under the terms of the [Creative Commons Attribution License](https://creativecommons.org/licenses/by/4.0/), which permits unrestricted use, distribution, and reproduction in any medium, provided the original author and source are credited.

**Data Availability Statement:** All relevant data are within the manuscript and its Supporting Information files.

**Funding:** The funders had no role in study design, data collection and analysis, decision to publish, or preparation of the manuscript. This study was planned by Japan Cardiovascular Research Foundation and funded by Bayer Yakuin Ltd. (contract No.: 017926).

**Competing interests:** I have read the journal's policy and have the following conflicts. Yasaka M received lecture fees from Boehringer Ingelheim,

## Abstract

The efficacy of early anticoagulation in acute stroke with nonvalvular atrial fibrillation (NVAF) remains unclear. We performed a study to evaluate the risk of recurrent ischemic stroke (IS) and major bleeding in acute IS patients with NVAF who started rivaroxaban. This observational study evaluated patients with NVAF and acute IS/transient ischemic attack (TIA) in the middle cerebral arterial territory who started rivaroxaban within 30 days after the index IS/TIA. The primary endpoints were recurrent IS and major bleeding within 90 days after the index IS/TIA. The relationship between the endpoints and the time to start rivaroxaban was evaluated by correlation analysis using cerebral infarct volume, determined by diffusion-weighted magnetic resonance images within 48 hours of onset of the index IS/TIA. Of 1309 patients analyzed, recurrent IS occurred in 30 (2.3%) and major bleeding in 11 (0.8%) patients. Among patients with known infarct size (N = 1207), those with small (<4.0 cm<sup>3</sup>), medium (≥4.0 and <22.5 cm<sup>3</sup>), and large (≥22.5 cm<sup>3</sup>) infarcts started rivaroxaban a median of 2.9, 2.9, and 5.8 days, respectively, after the index IS/TIA. Recurrent IS was significantly less frequent when starting rivaroxaban ≤14 days versus ≥15 days after IS (2.0% versus 6.8%, *P* = 0.0034). Incidences of recurrent IS and major bleeding in whom rivaroxaban was started <3 days (N = 584) after IS were also low: 1.5% and 0.7%, respectively. Initiation of rivaroxaban administration in acute IS or TIA was associated with a low recurrence of IS (2.3%), and a low incidence of major bleeding events (0.8%) for 90 days after the index stroke. For the prevention of recurrent attacks in acute IS patients with NVAF, it is feasible to start the administration of rivaroxaban within 14 days of onset. Rivaroxaban started within 3 days of onset may be a feasible treatment option for patients with a small or medium-sized infarction.

Bayer, Daiichi-Sankyo, Pfizer, BMS, Takeda, Sumitomo-Dainippon, Sanofi, Otsuka, CSL Behring, Ezai, Tanabe-Mitsubishi, Medtronic, Boston Scientific, and Sekisui Medical and research support from Sanofi, Boehringer Ingelheim, and Daiichi-Sankyo. Minematsu K received lecture fees from Bayer Healthcare, Otsuka Pharmaceutical, Boehringer-Ingelheim, AstraZeneca, Pfizer, Mitsubishi Tanabe Pharma Cooperation, Japan Stryker, Kowa, Nihon Medi-Physics Co, BMS, Sawai Pharmaceutical Co., Sumitomo Dainippon Pharma Co Ltd, Medico's Hirata, Daiichi Sankyo, Astellas Pharma, Kyowa Hakko Kirin Pharma, Inc, Sanofi, MSD, Eisai Co., Nippon Chemiphar, and Towa Pharmaceutical Co. Toyoda K received lecture fees from Boehringer Ingelheim, Bayer, Daiichi-Sankyo, Pfizer, BMS, Takeda, Sumitomo-Dainippon, Sanofi, Otsuka, CSL Behring, Tanabe-Mitsubishi, and Kyowa-Kirin and research support from Bayer, Daiichi-Sankyo, Pfizer, Takeda, and Japan Agency for Medical Research and Development (AMED: 17ek0210091h0001, 15ek0210055h0001). Mori E received lecture fees from Johnson & Johnson, Otsuka, Novartis, Daiichi-Sankyo, Sumitomo Dainippon Pharma, Sosei, Kyowahakko-Kirin, Toshiba, Medtronic, and Nihon Medi-Physics and research support from Eisai, Daiichi-Sankyo, Novartis, Fuji Film RI, General Electric, MHWL, MEXT, and JSPS. Hirano T received lecture fees from Astellas, Bayer, Boehringer Ingelheim, BMS, CSL Behring, Daiichi-Sankyo, Eisai, Medtronic, Otsuka, Pfizer, Sumitomo-Dainippon, Sanofi, Takeda, and Tanabe-Mitsubishi and research support from Astellas, Bayer, Boehringer Ingelheim, Daiichi-Sankyo, Eisai, MSD, Otsuka, Tanabe-Mitsubishi, and JSPS KAKENHI (Grant Number 25461320, PI, 2014-2016; Grant Number 16K09731, PI, 2016-2017). Hamasaki T received lecture fees from Johnson & Johnson and research support from Teikoku Pharmaceuticals. Yamagami H received lecture fees from Boehringer Ingelheim, Bayer, Daiichi-Sankyo, Pfizer, BMS, Takeda, Sanofi, Otsuka, Tanabe-Mitsubishi, Medtronic, Striker, and Medico's Hirata and research support from Boehringer Ingelheim and BMS. Nagao T received lecture fees from Astellas, AstraZeneca, Bayer, Bristol-Myers Squibb, Daiichi, Sankyo, Sumitomo Dainippon, Eisai, FP, Kyowa Hakko Kirin, Medtronic, Mochida, Nippon Boehringer Ingelheim, Novartis, Otsuka, Pfizer, Sanofi, Takeda, and Mitsubishi Tanabe. Yoshimura S received lecture fees from Boehringer Ingelheim, Bayer, Daiichi-Sankyo, Pfizer, BMS, Takeda, Sanofi, Otsuka, Tanabe-Mitsubishi, Medtronic, Stryker, and Medico's Hirata and research support from BMS and Takeda. Uchiyama S received lecture fees from

## Introduction

The efficacy of early anticoagulation in acute stroke patients with nonvalvular atrial fibrillation (NVAF) has not been established. The recurrence rate of cardioembolic stroke is high during the acute phase (1.6%–10.0% within 7–14 days of onset), which usually worsens prognosis [1,2]. Early anticoagulation after the onset of ischemic stroke (IS) may be useful to prevent recurrence, but this remains to be proven. Anticoagulation with warfarin has disadvantages, including a transient hypercoagulable state at the start of treatment [3] and an increased risk of bleeding complications [4]. Treatment with nonvitamin K antagonist oral anticoagulants (NOACs), including rivaroxaban is associated with a lower incidence of hemorrhagic stroke versus warfarin [5,6].

Unfortunately, large comparative trials of NOACs versus warfarin for stroke prevention in NVAF patients excluded patients in the acute stroke phase. In the ROCKET-AF study, [5] rivaroxaban was associated with significant reductions in intracranial hemorrhage (ICH) versus warfarin. In the J-ROCKET-AF study conducted in Japan, the ICH incidence with rivaroxaban was half that of warfarin [6].

According to current guidelines, the optimal timing to start warfarin or NOACs is within 2 weeks of stroke onset [7,8]. We performed the RELAXED (Recurrent Embolism Lessened by rivaroxaban, an Anti-Xa agent, of Early Dosing for acute ischemic stroke and transient ischemic attack [TIA] with atrial fibrillation [AF]) study to evaluate the risk of recurrent IS and major bleeding associated with rivaroxaban for acute IS or TIA patients with NVAF and investigate relationship between the risk and timing to start rivaroxaban.

## Materials and methods

### Ethics statement

The study protocol and associated documents were reviewed and approved by the Institutional Review Boards of each participating study center in [S1 Appendix](#). This study was conducted in compliance with the Ministry of Health, Labour and Welfare Ethical Guidelines for Clinical Research (MHLW Notification No. 415 [2008]), in addition to the Declaration of Helsinki. All patients (or guardians of participants in the case that patients could not communicate verbally) provided written informed consent.

### Study registrations

The study was registered at ClinicalTrials.gov (NCT02129920) and UMIN-clinical trials registry (UMIN000013932).

### Design

The detailed design and rationale of this study were previously published [9]. The registration and study periods were between February 2014 and April 2016. During the observation period (90 days after onset of index stroke), rivaroxaban was administered according to its approved dosage/administration schedule in Japan [6]. If the creatinine clearance was  $\geq 50$  mL/min or 15–49 mL/min, a once-daily dose of 15 mg or 10 mg was planned to be administered, respectively. The cerebral infarct size of the index IS/TIA was measured using diffusion-weighted images (DWI) by magnetic resonance imaging (MRI) performed within 48 hours after the event. An independent MRI Imaging Evaluation Committee evaluated the images.

Boehringer Ingelheim, Bayer, Daiichi-Sankyo, Takeda, Sumitomo Dainippon, Sanofi, Otsuka, Mitsubishi Tanabe, AstraZeneca, Shionogi, and Astellas Amgen and research support from the Japan Cardiovascular Research Foundation. This does not alter our adherence to PLOS ONE policies on sharing data and materials.

## Subjects

Patients with NVAF complicated with acute IS or TIA were enrolled consecutively using an internet-based enrollment system if they met the following criteria: patients who were hospitalized or those who visited the hospital as outpatients within 48 hours of the onset of acute IS or TIA; infarct in the middle cerebral artery area demonstrated by DWI or TIA showing symptoms corresponding to this area with negative DWI and disappearing within 24 hours; and receiving treatment with rivaroxaban that started  $\leq 30$  days after the onset of acute IS or TIA, regardless of anticoagulation initiated with unfractionated heparin and subsequently substituted by rivaroxaban. TIA was defined as focal neurological symptoms corresponding to the middle cerebral arterial area with negative DWI and disappearing within 24 hours.

Major exclusion criteria were hypersensitivity to rivaroxaban; presence of clinically significant hemorrhage, including gastrointestinal hemorrhage; moderate or severe liver disorder (Child-Pugh class B or C); renal failure (creatinine clearance:  $< 15$  mL/min); poorly controlled hypertension ( $> 180/100$  mmHg); pregnant women or those likely to become pregnant; treatment with HIV protease inhibitors; treatment with oral or injectable formulation of azole anti-fungal drugs; acute bacterial endocarditis; anticoagulation initiated with warfarin, dabigatran, apixaban, or edoxaban and then substituted by rivaroxaban; and patients not considered eligible for the study by the investigator.

## Endpoints

**Primary endpoints.** The primary endpoints were recurrence of IS (lasting  $> 24$  h, confirmed by MRI/computed tomography); major bleeding, such as symptomatic ICH or hemorrhagic infarction (parenchymal hemorrhage grade 2 and exacerbation of National Institutes of Health Stroke Scale [NIHSS] score  $\geq 4$ ); and other major bleeding according to the criteria defined by the International Society on Thrombosis and Hemostasis [10,11].

**Secondary endpoints.** Secondary endpoints were the incidence of IS and TIA; composite cardiovascular events including IS, TIA, systemic embolism, acute coronary syndrome, deep vein thrombosis, pulmonary embolism, other ischemic diseases, revascularization, cardiovascular death, and total death; any bleeding events; ICH; hemorrhagic transformation of cerebral infarcts; and other adverse events (AEs). AEs were collected and coded in accordance with MedDRA version 19.0. Additionally, we analyzed the incidence of recurrence of IS and occurrence of major hemorrhage according to whether or not heparin was used.

Any hemorrhage and ischemic or other events related to acute revascularization therapy (e.g., recombinant tissue plasminogen activator [rt-PA] or endovascular thrombectomy) were judged by an independent event adjudication committee. These events were not included as endpoints in order to evaluate the risk of IS and major bleeding without influence of acute revascularization.

## Statistical methods

Sample size calculation details were previously reported [9]. A total of 2000 patients were planned to be enrolled. Before the formal analysis, subjects were classified into several groups based on the infarct size and the timing to start rivaroxaban: three groups by tertile range of infarct size, small [ $< 4.0$  cm<sup>3</sup>], medium [ $\geq 4.0$  and  $< 22.5$  cm<sup>3</sup>], and large [ $\geq 22.5$  cm<sup>3</sup>], and four groups by start date of rivaroxaban,  $< 3$  days, 3–7 days, 8–14 days, and  $\geq 15$  days from the index IS/TIA. Subject demographic data and the endpoints of recurrent IS and major bleeding were analyzed descriptively. Continuous variables were expressed as means  $\pm$  SD or medians (interquartile range) and categorical variables were expressed as numbers and percentages. The group comparisons were conducted by chi-square test for categorical variables, and one-

way analysis of variance or Kruskal–Wallis test for continuous variables. Cox regression analyses were used to evaluate an effect of the following factors on outcomes: lesion size, time of rivaroxaban initiation, heparin treatment, and other subject baseline characteristics. When fitting Cox regression to the data, Firth's penalized likelihood approach was used to address issues caused by the small number of events. The base model for the Cox regression analysis included timing to start rivaroxaban administration and infarct size as factors. Factors found to be relevant in the univariate analyses were added to the base model. The relationship between the endpoints and the time to start rivaroxaban treatment during the acute stage of IS was determined by analyzing the correlations between primary endpoints, including recurrent IS or major bleeding and the cerebral infarct size. All tests were two-sided, and a  $P$ -value  $<0.05$  was considered significant. All statistical analyses were performed using SAS Version 9.1.3 for Windows (SAS Institute Inc., Cary, NC, USA).

## Results

### Subjects and treatment

In total, 1333 patients were enrolled from 157 sites across Japan. Of these, 1309 patients were included in the analysis. Overall, the majority of patients were male (755 [57.7%]) with a mean age of  $77.1 \pm 9.6$  years (Table 1). Most patients (80.1%) had not received anticoagulants before stroke onset; 97.3% had suffered a stroke, and 2.7% had suffered a TIA. When patients were stratified by cerebral infarct size, the major differences between groups were of the proportion of NIHSS at admission ( $P < 0.0001$ ), CHADS<sub>2</sub> score before onset ( $P = 0.05$ ), and rt-PA treatment or acute endovascular treatment ( $P < 0.0001$ ). No significant relationship was found between infarct size and dose. DWI data were available in 1209 patients, which comprised the DWI data analysis set. Analyses of infarct size and the timing to start rivaroxaban were based on 1207 patients who had both infarct size and administration timing data (Fig 1).

### Primary endpoints

Recurrence of IS occurred in 30 (2.3%) patients and major bleeding in 11 (0.8%) of 1309 patients. Major bleeding events were ICH in five patients; hemorrhagic infarction in three patients; and other bleeding events in three patients (gastrointestinal bleeding). In the patients with known infarct size and known timing to start rivaroxaban ( $n = 1207$ ), rivaroxaban was used at the early stage for small infarcts (median = 2.9 days, interquartile range [IQR] = 1.4–5.5) and medium infarcts (median = 2.9 days, IQR = 1.8–6.6) and at a later stage for large infarcts (median = 5.8 days, IQR = 2.6–10.2) (Fig 2). Regarding the correlation between the NIHSS scores and the timing to start rivaroxaban administration (Fig 3), patients who had lower NIHSS scores underwent earlier administration of rivaroxaban. The multivariate analysis demonstrated that recurrent IS was associated with the start of rivaroxaban administration  $\geq 15$  days after onset ( $P = 0.0021$ ), and major bleeding was associated with use of antiplatelet therapy before onset ( $P = 0.0369$ ) (Tables 2 and 3). In five of the 11 patients with major bleeding, antiplatelet therapy (aspirin in three and clopidogrel in two patients) was administered before onset.

### Secondary endpoints

When comparing the timing to start rivaroxaban administration ( $<3$  days, 3–7 days, 8–14 days, and  $\geq 15$  days) in 1309 patients, regardless of the infarct size, there was a significant difference among the four groups in the composite of IS and TIA ( $P = 0.0087$ ); composite cardiovascular events (i.e., ischemic stroke, TIA, systemic embolism, acute coronary syndrome, deep

**Table 1. Patient baseline demographic and clinical characteristics.**

|                                                        |        | Total |                  | Small infarct (<4.0 cm <sup>3</sup> ) |                  | Medium infarct (4.0 ≤ & < 22.5 cm <sup>3</sup> ) |                  | Large infarct (≥ 22.5 cm <sup>3</sup> ) |                  | P-value              |
|--------------------------------------------------------|--------|-------|------------------|---------------------------------------|------------------|--------------------------------------------------|------------------|-----------------------------------------|------------------|----------------------|
| Gender, n (%)                                          | Male   | 1308  | 755 (57.7)       | 411                                   | 228 (55.5)       | 393                                              | 227 (57.8)       | 404                                     | 230 (56.9)       | 0.802 <sup>a</sup>   |
| Age                                                    |        |       |                  |                                       |                  |                                                  |                  |                                         |                  |                      |
| Mean years (SD)                                        |        | 1308  | 77.1 (9.6)       | 411                                   | 77.1 (9.1)       | 393                                              | 77.2 (9.6)       | 404                                     | 77.4 (10.1)      | 0.943 <sup>b</sup>   |
| Age ≥ 75 years, n (%)                                  |        |       | 828 (63.3)       |                                       | 263 (64.0)       |                                                  | 246 (62.6)       |                                         | 260 (64.4)       | 0.862 <sup>a</sup>   |
| Weight in kg, mean (SD)                                |        | 1294  | 57.3 (12.1)      | 409                                   | 57.3 (12.3)      | 390                                              | 57.2 (12.4)      | 397                                     | 56.9 (11.9)      | 0.859 <sup>b</sup>   |
| Heart failure, n (%)                                   | Yes    | 1198  | 168 (14.0)       | 375                                   | 53 (14.1)        | 365                                              | 52 (14.2)        | 369                                     | 58 (15.7)        | 0.794 <sup>a</sup>   |
| Hypertension, n (%)                                    | Yes    | 1286  | 862 (67.0)       | 410                                   | 283 (69.0)       | 388                                              | 270 (69.6)       | 394                                     | 253 (64.2)       | 0.208 <sup>a</sup>   |
| Diabetes, n (%)                                        | Yes    | 1296  | 212 (16.4)       | 407                                   | 78 (19.2)        | 392                                              | 68 (17.3)        | 400                                     | 53 (13.3)        | 0.069 <sup>a</sup>   |
| CLcr mL/min, median (Q1–Q3)                            |        | 1291  | 58.8 (45.9–75.4) | 409                                   | 58.6 (46.5–73.4) | 389                                              | 58.0 (44.9–76.4) | 395                                     | 60.1 (46.1–77.9) | 0.473 <sup>c</sup>   |
| Anticoagulants before onset, n (%)                     | Yes    | 1308  | 260 (19.9)       | 411                                   | 87 (21.2)        | 393                                              | 75 (19.1)        | 404                                     | 81 (20.0)        | 0.762 <sup>a</sup>   |
| Antiplatelet medicine before onset, n (%)              | Yes    | 1308  | 277 (21.2)       | 411                                   | 90 (21.9)        | 393                                              | 84 (21.4)        | 404                                     | 83 (20.5)        | 0.893 <sup>a</sup>   |
| Stroke/TIA, n (%)                                      | Stroke | 1308  | 1273 (97.3)      | 401                                   | 401 (100.0)      | 393                                              | 393              | 404                                     | 404              | -                    |
|                                                        | TIA    |       | 35 (2.7)         | 10                                    | 10 (100.0)       |                                                  | -                |                                         | -                |                      |
| NIHSS at admission, median(Q1–Q3)                      |        | 1301  | 8 (3–17)         | 411                                   | 3 (1–7)          | 391                                              | 9 (4–16)         | 400                                     | 16 (9–22)        | <0.0001 <sup>c</sup> |
| CHADS <sub>2</sub> before onset, median (Q1–Q3)        |        | 1308  | 2 (1–2)          | 411                                   | 2 (1–3)          | 393                                              | 2 (1–3)          | 404                                     | 2 (1–2)          | 0.050 <sup>c</sup>   |
| HAS-BLED before onset, median (Q1–Q3)                  |        | 1308  | 2 (1–2)          | 411                                   | 2 (1–2)          | 393                                              | 2 (1–2)          | 404                                     | 2 (1–2)          | 0.449 <sup>c</sup>   |
| rt-PA treatment or acute endovascular treatment, n (%) | Yes    | 1308  | 424 (32.4)       | 411                                   | 104 (25.3)       | 393                                              | 159 (40.5)       | 404                                     | 132 (32.7)       | <0.0001 <sup>a</sup> |
| Heparin administration, n (%)                          | Yes    | 1308  | 638 (48.8)       | 411                                   | 210 (51.1)       | 393                                              | 198 (50.4)       | 404                                     | 189 (46.8)       | 0.421 <sup>a</sup>   |
| CLcr (mL/min), n (%)                                   | <50    | 1291  | 414 (32.1)       | 409                                   | 130 (31.8)       | 389                                              | 138 (35.5)       | 395                                     | 119 (30.1)       | 0.262 <sup>a</sup>   |
| Rivaroxaban dose                                       | 10 mg  | 1305  | 440 (33.7)       | 410                                   | 136 (33.2)       | 393                                              | 140 (35.6)       | 404                                     | 136 (33.7)       | 0.742 <sup>a</sup>   |

<sup>a</sup>,  $\chi^2$  test

<sup>b</sup>, Analysis of variance

<sup>c</sup>, Kruskal–Wallis test

Abbreviations: CLcr, creatinine clearance; NIHSS, National Institute of Health Stroke Scale; rt-PA, recombinant tissue plasminogen activator; SD, standard deviation; TIA, transient ischemic attack.

<https://doi.org/10.1371/journal.pone.0212354.t001>

vein thrombosis, pulmonary embolism, other ischemic disease, revascularization, cardiovascular death, and total death) ( $P = 0.0042$ ); any bleeding event ( $P < 0.0001$ ); and hemorrhagic transformation of cerebral infarcts ( $P < 0.0001$ ) (Table 4). The incidences of these events were higher in patients starting rivaroxaban  $\geq 15$  days after index IS/TIA than in those starting within 14 days (<3 days, 3–7 days or 8–14 days). Primary and secondary endpoint measures compared by timing to start rivaroxaban administration and size of infarct was described in the S1 Table.

The recurrence rate of ischemic stroke was higher  $\geq 15$  days after stroke onset versus  $\leq 14$  days of stroke onset (6.8% versus 2.0%,  $P = 0.0034$ , chi-square test) although there was no significant difference in the incidence of major bleeding within 14 days of stroke onset and that of  $\geq 15$  days after stroke onset (0.9% versus 0%,  $P = 0.3704$ , chi-square test) (Fig 4). Recurrent IS occurred more frequently than major bleeding (2.3% and 0.8%, respectively,  $P = 0.0028$ , chi-square test). Fig 5 shows the incidence of IS recurrence by infarct size according to the timing to start rivaroxaban administration. The trend of the incidence of IS in each infarct size group was similar to the overall trend. Regarding hemorrhagic complications by cerebral infarct size (Fig 6), they occurred less frequently within 14 days after stroke onset versus ischemic events, but these did not seem to be related to infarct size.



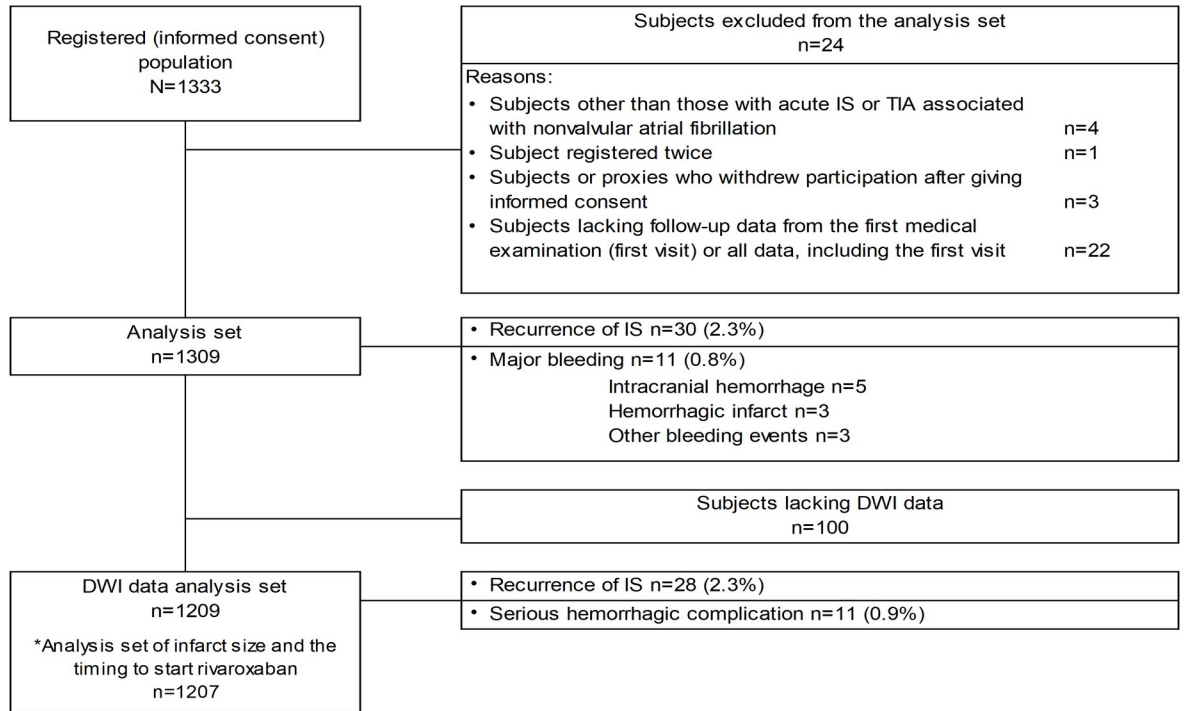

**Fig 1. Flow of patients in the study.** \*Analyses of infarct size and the timing to start rivaroxaban were based on 1207 patients who had both infarct size and administration timing data. DWI, diffusion-weighted images; IS, ischemic stroke; TIA, transient ischemic attack.

<https://doi.org/10.1371/journal.pone.0212354.g001>

Regarding rt-PA and timing to start rivaroxaban administration, the frequency of rt-PA treatment was 171/584, 29.3% (<3 days), 106/435, 24.5% (3–7 days), 50/198, 25.3% (8–14

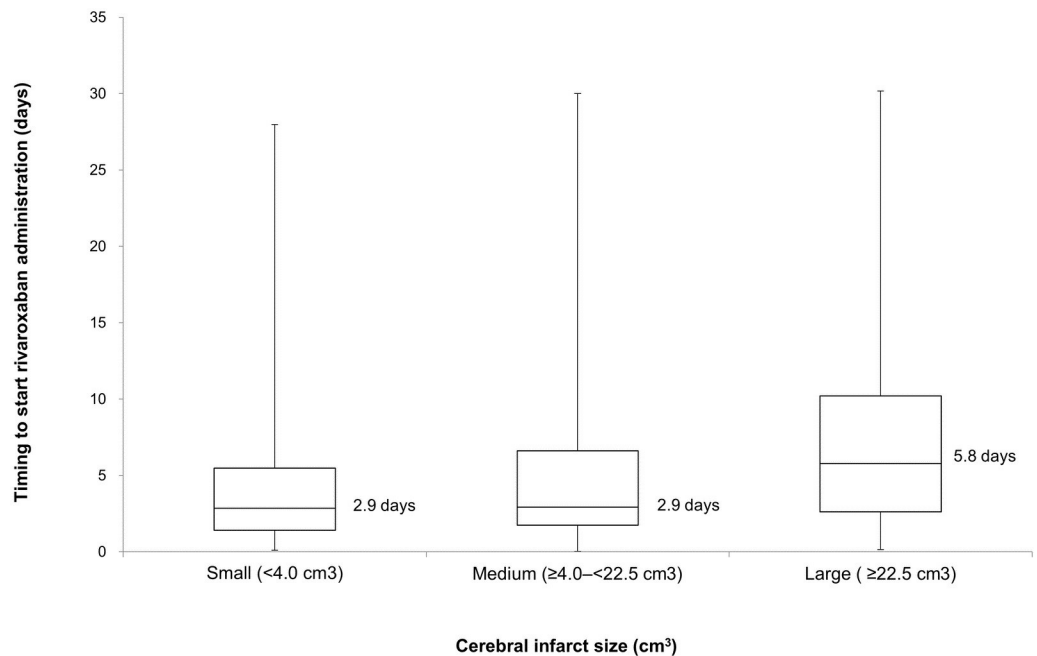

**Fig 2. Correlation between timing to start rivaroxaban administration and cerebral infarct size.**

<https://doi.org/10.1371/journal.pone.0212354.g002>

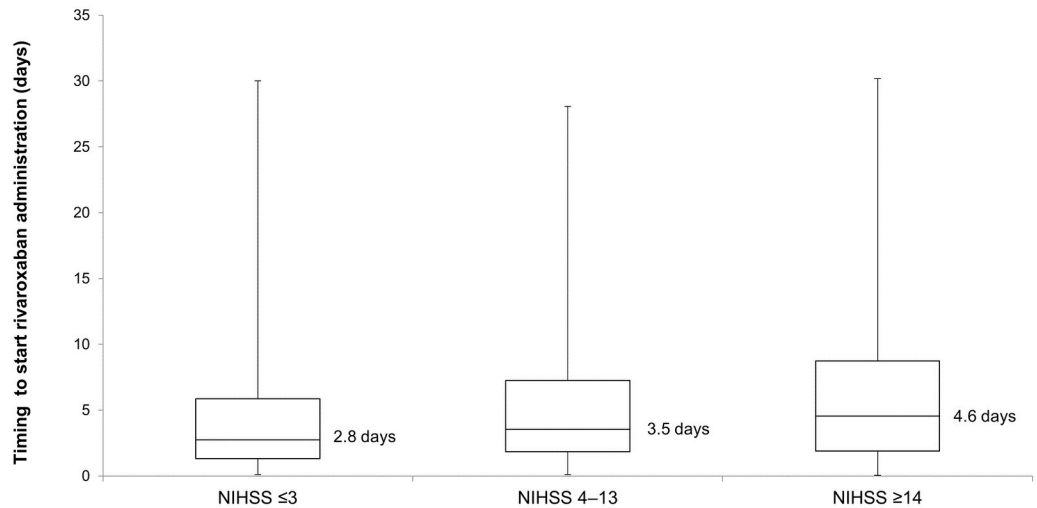

**Fig 3. Correlation between timing to start rivaroxaban administration and NIHSS.** NIHSS, National Institutes of Health Stroke Scale.

<https://doi.org/10.1371/journal.pone.0212354.g003>

days) and 12/88, 13.6% ( $\geq 15$  days). The frequency of the rt-PA treatment was lower  $\geq 15$  days after stroke onset versus  $\leq 14$  days of stroke onset (13.6% versus 26.9%,  $P = 0.006$ , chi-square test).

### Adverse events

The incidence of AEs (except major bleeding) after starting rivaroxaban was summarized in [S2 Table](#). The total incidence of AEs was 4.6% ( $n = 27$ ) in the group receiving rivaroxaban within  $< 3$  days of stroke onset, 6.4% ( $n = 28$ ) in the group receiving rivaroxaban 3–7 days after stroke onset, 5.6% ( $n = 11$ ) in the group receiving rivaroxaban 8–14 days after stroke onset, and 6.8% ( $n = 6$ ) in the group receiving rivaroxaban  $\geq 15$  days after stroke onset. There were no significant differences among groups regarding the total incidence of AEs.

**Incidence of recurrent IS and major bleeding among patients previously treated with heparin.** A median 10,000 U (10,000–12,000 U)/day of heparin followed by rivaroxaban was administered in 638 patients (heparin group, 48.8%) for a median of 3.3 days (1.8–6.3 days) and not in the other 669 (non-heparin group, two data were not available). The incidence of IS recurrence was higher among the heparin group ([Fig 7](#)) versus patients treated with rivaroxaban alone ([Fig 8](#)) (3.0% versus 1.6%, respectively,  $P = 0.1010$ ); however, there was no significant difference. When we compared the incidence rates of IS recurrence or major bleeding events in the patients who started anticoagulation treatment  $< 3$  days after stroke onset, they were numerically higher in the heparin group than the non-heparin group (IS recurrence, 2.7% versus 1.0%, respectively,  $P = 0.104$ ; major bleeding, 1.0% versus 0.5%, respectively,  $P = 1.0$ ), but without significant difference.

### Discussion

This was a large-scale registration study with  $> 1300$  patients, in which we observed the usefulness of rivaroxaban for acute IS and TIA patients with NVAf. The key results of this study were that initiation of rivaroxaban administration in acute IS or TIA was associated with a low recurrence of IS (incidence of 2.3% [30/1309 patients]) and a low incidence of major bleeding events (0.8% [11/1309] patients), that recurrent IS occurred more frequently than major

**Table 2. Univariate and multivariate analysis of the associations between Ischemic stroke recurrence and lesion size, timing to start rivaroxaban administration, and other background characteristics (using the Firth method).**

| Model               | Factor                                                                        | Number of pts with event (%)               |                                        | Odds ratio (test/reference)            |                         |        |
|---------------------|-------------------------------------------------------------------------------|--------------------------------------------|----------------------------------------|----------------------------------------|-------------------------|--------|
|                     |                                                                               | Test                                       | Reference                              | (95% CI)                               | P-value                 |        |
| Univariate analysis | Sex                                                                           | Female<br>9/553 (1.6%)                     | Male<br>21/754 (2.8%)                  | 0.595<br>(0.275–1.288)                 | 0.188                   |        |
|                     | Age                                                                           | ≥75 years<br>20/827 (2.4%)                 | <75 years<br>10/480 (2.1%)             | 1.138<br>(0.536–2.416)                 | 0.737                   |        |
|                     | Weight (continuous, per 10)                                                   | -                                          | -                                      | 0.973<br>(0.723–1.310)                 | 0.856                   |        |
|                     | Heart failure                                                                 | Present<br>3/94 (3.2%)                     | Absent<br>27/1213 (2.2%)               | 1.65<br>(0.529–5.149)                  | 0.388                   |        |
|                     | Hypertension                                                                  | Present<br>24/861 (2.8%)                   | Absent<br>6/446 (1.3%)                 | 1.983<br>(0.828–4.748)                 | 0.125                   |        |
|                     | Diabetes                                                                      | Present<br>7/212 (3.3%)                    | Absent<br>23/1095 (2.1%)               | 1.666<br>(0.721–3.847)                 | 0.232                   |        |
|                     | CLcr (mL/min)                                                                 | <50<br>11/414 (2.7%)                       | ≥50<br>19/893 (2.1%)                   | 1.278<br>(0.611–2.676)                 | 0.515                   |        |
|                     | Heparin                                                                       | Present<br>19/636 (3.0%)                   | Absent<br>11/671 (1.6%)                | 1.814<br>(0.868–3.792)                 | 0.114                   |        |
|                     | Anticoagulants before onset                                                   | Present<br>8/260 (3.1%)                    | Absent<br>22/1047 (2.1%)               | 1.534<br>(0.688–3.422)                 | 0.296                   |        |
|                     | Antiplatelet medicine before onset                                            | Present<br>10/277 (3.6%)                   | Absent<br>20/1030 (1.9%)               | 1.935<br>(0.908–4.125)                 | 0.087                   |        |
|                     | Antiplatelet therapy after onset                                              | Present<br>7/189 (3.7%)                    | Absent<br>23/1118 (2.1%)               | 1.916<br>(0.828–4.431)                 | 0.129                   |        |
|                     | NIHSS at admission (continuous per 1)                                         | -                                          | -                                      | 1.002                                  | 0.937                   |        |
|                     | Multivariate analysis<br>(base model)                                         | Timing to start rivaroxaban administration | ≥15 days<br>6/79 (7.6%)                | ≤14 days<br>22/1128 (2.0%)             | 4.465<br>(1.754–11.367) | 0.0017 |
|                     | Multivariate analysis<br>(base model +<br>antiplatelet medicine before onset) | Infarct size                               | >22.4 cm <sup>3</sup><br>10/404 (2.5%) | ≤22.4 cm <sup>3</sup><br>18/803 (2.2%) | 0.917<br>(0.415–2.026)  | 0.8296 |
|                     |                                                                               | Timing to start rivaroxaban administration | ≥15 days<br>6/79 (7.6%)                | ≤14 days<br>22/1128 (2.0%)             | 4.272<br>(1.69–10.8)    | 0.0021 |
|                     | Infarct size                                                                  | >22.4 cm <sup>3</sup><br>10/404 (2.5%)     | ≤22.4 cm <sup>3</sup><br>18/803 (2.2%) | 0.944<br>(0.431–2.07)                  | 0.8856                  |        |
|                     | Antiplatelet medicine before onset                                            | Present<br>9/257 (3.5%)                    | Absent<br>19/950 (2.0%)                | 1.738<br>(0.792–3.814)                 | 0.1679                  |        |

Abbreviations: IS, ischemic stroke; CLcr, creatinine clearance; NIHSS, National Institute of Health Stroke Scale.

<https://doi.org/10.1371/journal.pone.0212354.t002>

bleeding (2.3% and 0.8%, respectively.  $P = 0.0028$ , chi-square test), that the frequency of recurrent IS was significantly lower when rivaroxaban treatment started  $\leq 14$  days versus  $\geq 15$  days after the index IS/TIA (2.0% versus 6.8%,  $P = 0.0034$ , chi-square test, and confirmed by multivariate analysis,  $P = 0.0021$ ), and that a small or intermediate cerebral infarct size and NIHSS score  $\leq 3$  were associated with an earlier start of rivaroxaban administration (median 2.9 days and median 2.8 days, respectively).

The low incidence of IS recurrence among those who initiated early rivaroxaban treatment in the present study was consistent with that reported by Seiffge et al [12]. In their study, NOACs were used for secondary prophylaxis in a sample of 204 patients with a similar mean age, atrial fibrillation (AF), and recent acute IS; they reported six events of IS recurrence among 204 patients (7.7%/y) [12]. A recently conducted study evaluating the current trends of OAC choice for acute stroke patients with NVAF in Japan reported that patients starting NOACs (dabigatran  $N = 203$ , rivaroxaban  $N = 238$ , apixaban  $N = 25$ ) earlier had smaller



**Table 3. Univariate and multivariate analysis of the associations between major bleeding and lesion size, timing to start rivaroxaban administration, and other background characteristics (using the Firth method).**

| Model                               | Factor                                     | Number of pts with event (%)               |                                       | Odds ratio (test/reference)           |                        |        |
|-------------------------------------|--------------------------------------------|--------------------------------------------|---------------------------------------|---------------------------------------|------------------------|--------|
|                                     |                                            | Test                                       | Reference                             | (95% CI)                              | P-value                |        |
| Univariate analysis                 | Sex                                        | Female<br>6/553 (1.1%)                     | Male<br>5/754 (0.7%)                  | 1.618<br>(0.517–5.068)                | 0.409                  |        |
|                                     | Age                                        | ≥75 years<br>8/827 (1.0%)                  | <75 years<br>3/480 (0.6%)             | 1.415<br>(0.405–4.943)                | 0.587                  |        |
|                                     | Weight (continuous, per 10)                | -                                          | -                                     | 0.906<br>(0.546–1.503)                | 0.703                  |        |
|                                     | Heart failure                              | Present<br>2/94 (2.1%)                     | Absent<br>9/1213 (0.7%)               | 3.427<br>(0.832–14.109)               | 0.088                  |        |
|                                     | Hypertension                               | Present<br>6/861 (0.7%)                    | Absent<br>5/446 (1.1%)                | 0.61<br>(0.195–1.911)                 | 0.396                  |        |
|                                     | Diabetes                                   | Present<br>2/212 (0.9%)                    | Absent<br>9/1095 (0.8%)               | 1.359<br>(0.334–5.530)                | 0.669                  |        |
|                                     | CLcr (mL/min)                              | <50<br>3/414 (0.7%)                        | ≥50<br>8/893 (0.9%)                   | 0.886<br>(0.253–3.097)                | 0.850                  |        |
|                                     | Heparin                                    | Present<br>7/636 (1.1%)                    | Absent<br>4/671 (0.6%)                | 1.767<br>(0.546–5.721)                | 0.342                  |        |
|                                     | Anticoagulants before onset                | Present<br>2/260 (0.8%)                    | Absent<br>9/1047 (0.9%)               | 1.057<br>(0.260–4.296)                | 0.938                  |        |
|                                     | Antiplatelet medicine before onset         | Present<br>5/277 (1.8%)                    | Absent<br>6/1030 (0.6%)               | 3.181<br>(0.260–4.296)                | 0.048                  |        |
|                                     | Antiplatelet therapy after onset           | Present<br>1/189 (0.5%)                    | Absent<br>10/1118 (0.9%)              | 0.840<br>(0.150–4.700)                | 0.843                  |        |
|                                     | NIHSS at admission (continuous per 1)      | -                                          | -                                     | 1.066                                 | 0.040                  |        |
|                                     | Multivariate analysis                      | Timing to start rivaroxaban administration | ≥15 days<br>0/79 (0.0%)               | ≤14 days<br>11/1128 (1.0%)            | 0.502<br>(0.029–8.550) | 0.6337 |
|                                     | (base model)                               | Infarct size                               | >22.4 cm <sup>3</sup><br>5/404 (1.2%) | ≤22.4 cm <sup>3</sup><br>6/803 (0.7%) | 1.847<br>(0.599–5.697) | 0.2860 |
|                                     | Multivariate analysis                      | Timing to start rivaroxaban administration | ≥15 days<br>0/79 (0.0%)               | ≤14 days<br>11/1128 (1.0%)            | 0.526<br>(0.032–8.66)  | 0.6533 |
| (base model +                       | Infarct size                               | >22.4 cm <sup>3</sup><br>5/404 (1.2%)      | ≤22.4 cm <sup>3</sup><br>6/803 (0.7%) | 1.823<br>(0.602–5.517)                | 0.2881                 |        |
| heart failure)                      | Heart failure                              | Present<br>2/90 (2.2%)                     | Absent<br>9/1117 (0.8%)               | 3.166<br>(0.801–12.514)               | 0.1004                 |        |
| Multivariate analysis               | Timing to start rivaroxaban administration | ≥15 days<br>0/79 (0.0%)                    | ≤14 days<br>11/1128 (1.0%)            | 0.48<br>(0.03–7.73)                   | 0.6047                 |        |
| (base model +                       | Infarct size                               | >22.4 cm <sup>3</sup><br>5/404 (1.2%)      | ≤22.4 cm <sup>3</sup><br>6/803 (0.7%) | 1.852<br>(0.612–5.6)                  | 0.2751                 |        |
| antiplatelet medicine before onset) | Antiplatelet medicine before onset         | Present<br>5/257 (1.9%)                    | Absent<br>6/950 (0.6%)                | 3.239<br>(1.074–9.766)                | 0.0369                 |        |
| Multivariate analysis               | Timing to start rivaroxaban administration | ≥15 days<br>0/79 (0.0%)                    | ≤14 days<br>11/1128 (1.0%)            | 0.385<br>(0.023–6.397)                | 0.5059                 |        |
| (base model +                       | Infarct size                               | >22.4 cm <sup>3</sup><br>5/404 (1.2%)      | ≤22.4 cm <sup>3</sup><br>6/803 (0.7%) | 1.13<br>(0.337–3.793)                 | 0.8434                 |        |
| NIHSS at admission)                 | NIHSS at admission (continuous per 1)      | -                                          | -                                     | 1.068<br>(1–1.14)                     | 0.0513                 |        |

Abbreviations: IS, ischemic stroke; CLcr, creatinine clearance; NIHSS, National Institute of Health Stroke Scale.

<https://doi.org/10.1371/journal.pone.0212354.t003>

infarcts and lower NIHSS scores [13]. The triple AXEL study, a randomized, multicenter, open-label trial, conducted in Korea, compared the efficacy and safety of acute anticoagulant therapy within 5 days of index IS between the rivaroxaban group (n = 95) and warfarin group

**Table 4. Primary and secondary endpoint measures compared by timing to start rivaroxaban administration.**

|                                 | Timing to start rivaroxaban administration |           |           |           |         | $X^2$ -test<br>P-value |
|---------------------------------|--------------------------------------------|-----------|-----------|-----------|---------|------------------------|
|                                 | <3 days                                    | 3–7 days  | 8–14 days | ≥15 days  | Unknown |                        |
| Total, 1,309                    | 584                                        | 435       | 198       | 88        | 4       |                        |
| Event                           | n (%)                                      | n (%)     | n (%)     | n (%)     |         |                        |
| Recurrent IS                    | 9 (1.5)                                    | 11 (2.5)  | 4 (2.0)   | 6 (6.8)   | 0       | 0.0216                 |
| Major bleeding                  | 4 (0.7)                                    | 5 (1.1)   | 2 (1.0)   | 0         | 0       | 0.6874                 |
| Composite of IS and TIA         | 10 (1.7)                                   | 13 (3.0)  | 5 (2.5)   | 7 (8.0)   | 0       | 0.0087                 |
| Composite cardiovascular events | 21 (3.6)                                   | 21 (4.8)  | 10 (5.1)  | 11 (12.5) | 0       | 0.0042                 |
| Any bleeding event              | 62 (10.6)                                  | 82 (18.9) | 41 (20.7) | 36 (40.9) | 0       | <0.0001                |
| Intracranial hemorrhage         | 1 (0.2)                                    | 4 (0.9)   | 0         | 0         | 0       | 0.1670                 |
| Hemorrhagic infarction          | 60 (10.3)                                  | 77 (17.7) | 41 (20.7) | 36 (40.9) | 0       | <0.0001                |
| Adverse events                  | 27 (4.6)                                   | 28 (6.4)  | 11 (5.6)  | 6 (6.8)   | 0       | 0.5962                 |

Abbreviations: IS, ischemic stroke; TIA, transient ischemic attack.

<https://doi.org/10.1371/journal.pone.0212354.t004>

(n = 88), with acute mild ischemic stroke associated with atrial fibrillation, and demonstrated that both treatments had comparable safety and efficacy [14]. In the rivaroxaban group, symptomatic recurrent ischemic stroke was seen only in one patient (1.1%) during an observational period of 4 weeks. It seems that the lower incidence of recurrent IS when rivaroxaban treatment started ≤14 days versus ≥15 days after the index IS/TIA in the present study supports current guidelines recommending that the optimal timing to start warfarin or NOACs is within 2 weeks of stroke onset [7,8].

The incidence of major bleeding and ICH in the present study was low. This was consistent with that reported in the study by Seiffge et al; however, in their study, the risk of ICH was low regardless of the timing of NOAC initiation [12]. Our results are also in line with those of a

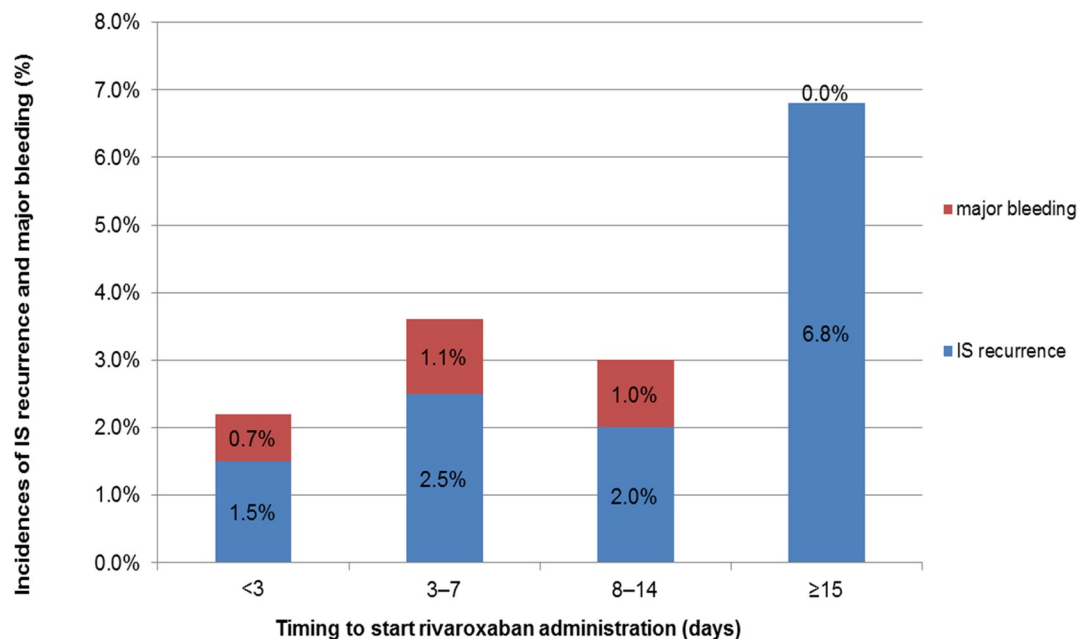

**Fig 4. Incidences of ischemic stroke recurrence and major bleeding by timing to start rivaroxaban.** IS, ischemic stroke.

<https://doi.org/10.1371/journal.pone.0212354.g004>

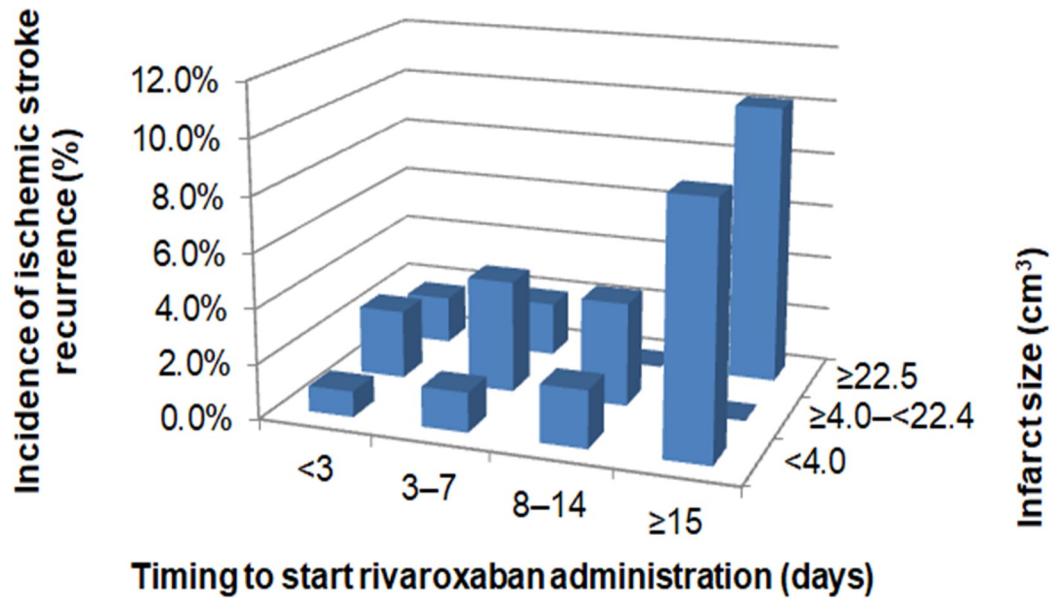

Fig 5. Incidences of ischemic stroke recurrence by timing to start rivaroxaban and cerebral infarct size.

<https://doi.org/10.1371/journal.pone.0212354.g005>

recent Japanese study assessing the 3-month risk-benefit profile of anticoagulation after stroke in patients with NVAF, in which the rates of major bleeding, particularly ICH, were lower with NOACs than with warfarin, although the differences were not significant [15]. The triple AXEL study also demonstrated low incidences of major bleeding (1.1%) and symptomatic ICH (0%) (n = 95) in the rivaroxaban group [14]. In Japan and other East Asian countries, the incidence of ICH is known to be markedly higher than that in Western countries [16,17]. However, several clinical trials of NOACs have shown a consistently and substantially lower incidence of ICH among Asians and non-Asians compared with those receiving warfarin

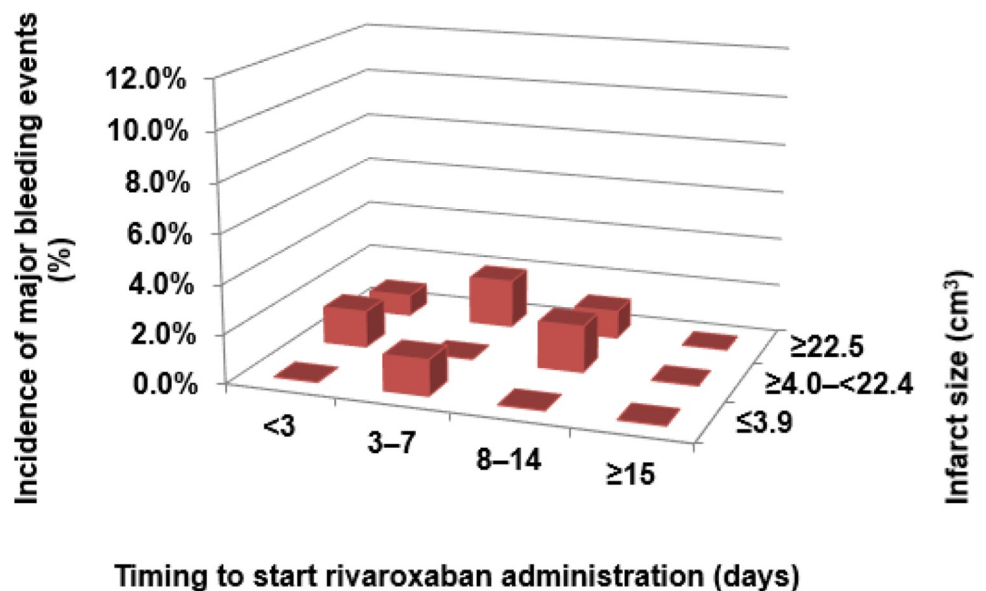

Fig 6. Incidences of major bleeding by timing to start rivaroxaban and cerebral infarct size.

<https://doi.org/10.1371/journal.pone.0212354.g006>

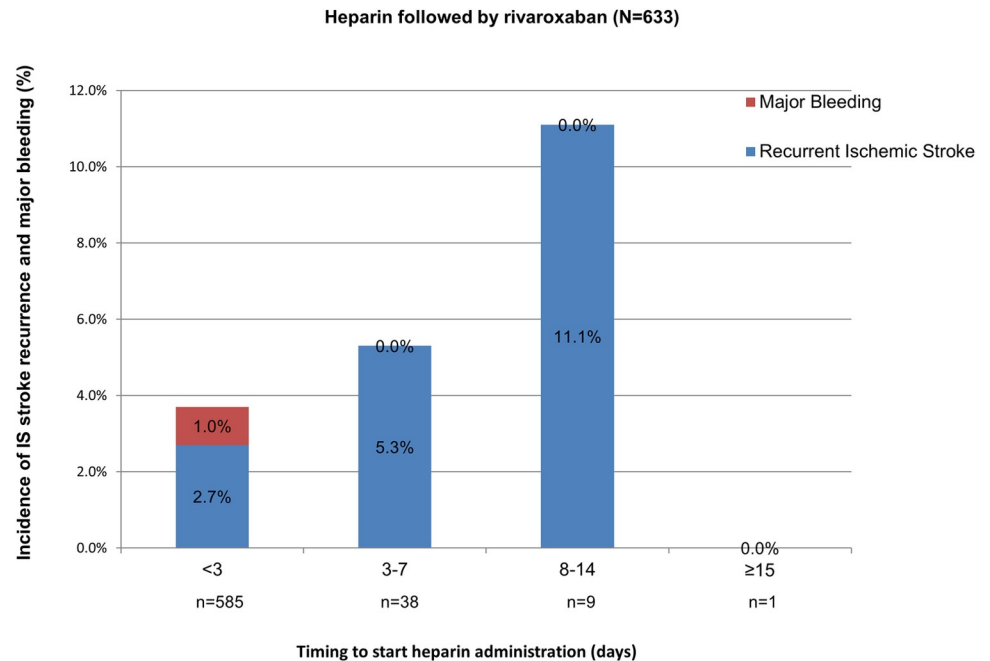

**Fig 7. Recurrent ischemic stroke and major bleeding according to timing to start anticoagulation in patients treated with heparin followed by rivaroxaban.** IS, ischemic stroke.

<https://doi.org/10.1371/journal.pone.0212354.g007>

[16,17]. As in previous studies, the low incidence of ICH observed in the present study may be attributed to the inhibitory coagulation mechanisms of NOACs on coagulation [16–18].

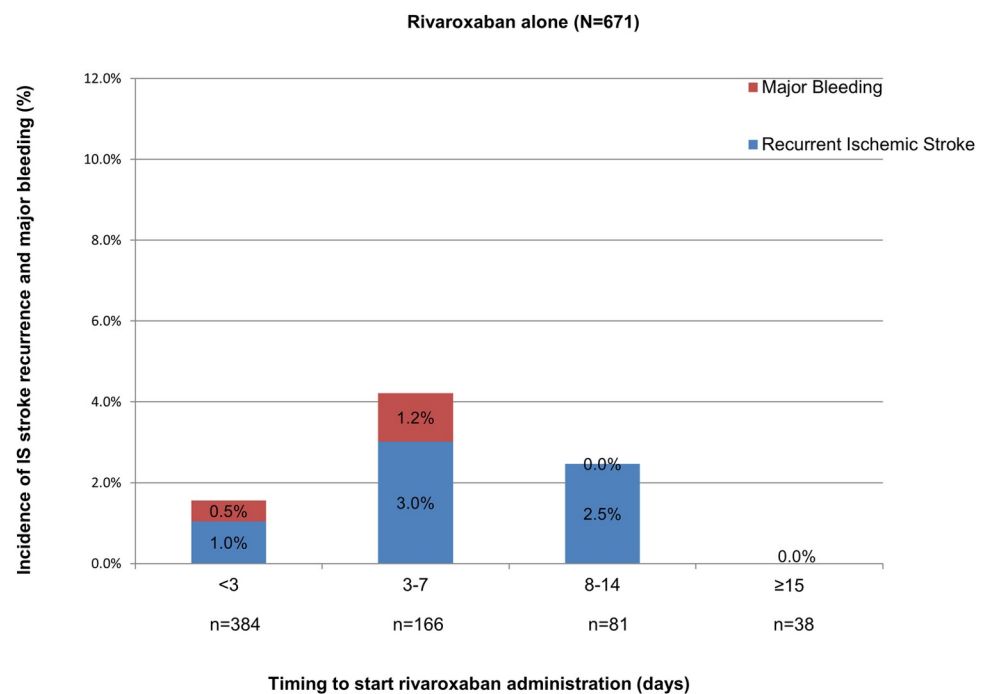

**Fig 8. Recurrent ischemic stroke and major bleeding according to timing to start anticoagulation in patients treated with rivaroxaban alone.** IS, ischemic stroke.

<https://doi.org/10.1371/journal.pone.0212354.g008>

The RAF-NOACs study, which investigated early recurrence and major bleeding in 1,127 patients who had acute ischemic stroke associated with NVAF and started to take NOAC for the secondary prevention of stroke, demonstrated that a combined rate of ischemic embolic recurrence and severe bleeding was 5% within 90 days, as low as 3.1% (IS recurrence 2.3% and major bleeding 0.8%) of the current study, and a multivariate analysis suggested no significant marginal effect regarding the timing of administration despite the occurrences of the combined rate of ischemic embolic recurrence and severe bleeding having variability with respect to the timing of NOAC administration, 12.4% within 3 days, 2.1% between 3 and 14 days, and 9.1% beyond 14 days [19]. It included 366 patients who received rivaroxaban, in whom recurrent ischemic stroke was noted in only four patients (1.1%) and major bleeding including symptomatic hemorrhagic transformation was in only nine patients (2.5%). In the current study, recurrent IS occurred more frequently than major bleeding (2.3% and 0.8%, respectively,  $P = 0.0028$ ), incidence of major bleeding was low (0.7%) when started within 3 days, and a small or intermediate cerebral infarct size was associated with an earlier start of rivaroxaban administration (median 2.9 days). Therefore, rivaroxaban started as early as 3 days or less after stroke onset may be a feasible treatment option for patients with a small or medium-sized infarction.

In the present study, multivariate analysis demonstrated that major bleeding was associated with use of antiplatelet therapy before onset. This is clinically relevant for the following reasons: first, aspirin and other antiplatelet therapies have irreversible effects on platelet aggregation, which may play a role in developing major bleeding early after the index IS/TIA. Second, major bleeding may be associated with vascular impairment frequently, which is seen in patients with several atherosclerotic diseases that require antiplatelet therapy.

Because the incidence of stroke recurrence was not higher among patients treated with rivaroxaban alone versus patients treated with heparin followed by rivaroxaban, it may be appropriate to initiate treatment with rivaroxaban monotherapy as an alternative to initial treatment with heparin. Heparin may be started early in patients without AF during hospitalization; however, it may be replaced with rivaroxaban once AF is observed. In the RAF-NOACs study, low molecular weight heparin (LMWH) was administered in 10% of patients before commencement of NOAC treatment [19]. The authors found that these patients had a significantly higher rate of major bleeding compared with those treated with NOAC alone and recommend not to start with LMWH before the commencement of NOACs.

The reason why the frequency of the rt-PA treatment was lower in patients starting rivaroxaban  $\geq 15$  days after stroke onset versus  $\leq 14$  days of stroke onset may reflect that rt-PA treatment can be difficult to perform and that treatment initiation with rivaroxaban can be delayed in the case of large infarctions.

## Limitations

This study has several limitations that may have led to biased results. The number of patients registered (1333) was lower than planned (2000), which may have led to underpowered results. The reasons for not meeting the target sample size as originally planned were that there were other treatment options available to patients at the time (three other NOACs and warfarin), promotion for study enrollment may have been inadequate, and we were unable to extend the enrollment period owing to limited research funding. When fitting Cox regression to the data, however, Firth's penalized likelihood approach was used to cope with issues caused by the small number of events, and we consider that the issue of smaller sample size than that planned did not have a significant effect on our results and that the small occurrence rates of both ischemic stroke and major bleeding in the  $> 1300$  registered cases is an important finding that

supports acute anticoagulant treatment with DOAC in acute ischemic stroke patients with NVAF. Because this was an observational study, not a randomized control trial, the timing to start rivaroxaban administration was determined by each investigator. Unfractionated heparin was used in approximately half of the patients; however, most patients were treated with low heparin doses (10,000 IU/day) during short periods. Because the power of a sub-analysis would be weak, the usefulness of heparin on the study treatment could not be judged from the present study; therefore, to clarify the appropriate timing to start rivaroxaban administration according to infarct size and the advantages and disadvantages of heparin administration, further prospective randomized trials are required. Of the total sample, 32.7% of patients underwent acute reperfusion therapy, endovascular treatment, or treatment with rt-PA, which depended on each investigator. Data on MRI-DWI were not available in 100 cases. Furthermore, the power of the subanalysis was decreased when the incidence of IS recurrence and major bleeding among patients treated with heparin followed by rivaroxaban was compared with those who received rivaroxaban monotherapy only. Finally, although the rivaroxaban dose (15/10 mg) approved in Japan differs from the dose approved in Western countries (20/15 mg), the pharmacokinetic and pharmacodynamic profiles of rivaroxaban 15/10 mg in Japanese patients were found to be similar to those of 20/15 mg in Caucasian populations [6,20]. J-ROCKET AF trial a prospective, randomized, double-blind phase III trial conducted in Japan confirmed non-inferiority of rivaroxaban (15/10 mg) to warfarin and supported bridging the global ROCKET AF result into Japanese clinical practice [5, 6]. Thus, considering the smaller physique of Japanese subjects versus Caucasian patients, low-dose rivaroxaban (15/10 mg) seems more appropriate for Japanese versus Caucasian patients. Similarly, post-Marketing Alteplase Registration Study (J-MARS) demonstrated that thrombolysis with 0.6 mg/kg intravenous alteplase for acute ischemic stroke Japanese patients in routine clinical practice was comparable to that with 0.9 mg/kg alteplase used in North America and the European Union [21–23]. Therefore, the present results may be applicable to non-Japanese populations.

## Conclusions

Initiation of rivaroxaban administration in acute IS or TIA was associated with a low recurrence of IS (2.3%), and a low incidence of major bleeding events (0.8%) for 90 days after the index stroke. For the prevention of recurrent attack in acute IS patients with NVAF, we consider it feasible to start the administration of rivaroxaban within 14 days of onset. Rivaroxaban started within 3 days of stroke onset may also be a feasible treatment option for patients with a small or medium-sized infarction.

## Supporting information

**S1 Appendix. List of institutional review boards of participating study centers.**  
(DOCX)

**S1 Table. Primary and secondary endpoint measures compared by timing to start rivaroxaban administration and size of infarct.**  
(DOCX)

**S2 Table I. Incidence of adverse events (AEs) (except hemorrhage) after starting rivaroxaban.**  
(DOCX)



## Acknowledgments

The authors wish to thank all co-investigators (listed below) for their contributions.

**Advisor:** Takenori Yamaguchi<sup>1</sup>; Principal investigator: Kazuo Minematsu<sup>1</sup>; **Handling committee:** Shinichiro Uchiyama<sup>2</sup>, Yasushi Okada<sup>3</sup>, Satoshi Okuda<sup>4</sup>, Kazumi Kimura<sup>5</sup>, Norio Tanahashi<sup>6</sup>, Yasuo Terayama<sup>7</sup>, Yoichiro Hashimoto<sup>8</sup>, Yasuhiro Hasegawa<sup>9</sup>, Kiyohiro Houkin<sup>10</sup>, Masayasu Matsumoto<sup>11</sup>, Kazuo Kitagawa<sup>12</sup>; **Protocol committee:** Masahiro Yasaka (Chairman)<sup>3</sup>, Kazunori Toyoda (Vice chairman)<sup>1</sup>, Takehiko Nagao<sup>13</sup>, Hiroshi Yamagami<sup>1</sup>, Shinichi Yoshimura<sup>14</sup>; **Independent event adjudicate committee:** Etsuro Mori (chairman)<sup>15</sup> for all events, Ken Nagata<sup>16</sup>, Shigeru Nogawa<sup>17</sup>, Yoshiaki Kumon<sup>18</sup> for Brain events, Takeshi Kimura<sup>19</sup>, Yutaka Furukawa<sup>20</sup>, Tomohiro Sakamoto<sup>21</sup> for Cardiac events; **Image evaluating committee:** Teruyuki Hirano (chairman)<sup>22</sup>, Makoto Sasaki (advisor)<sup>23</sup>, Kohsuke Kudo<sup>24</sup>, Toshinori Hirai<sup>25</sup>; **Safety committee:** Shotai Kobayashi<sup>26</sup>; **Publication committee:** Masahiro Yasaka<sup>3</sup>, Kazuo Minematsu<sup>1</sup>, Kazunori Toyoda<sup>1</sup>, Etsuro Mori<sup>14</sup>, Teruyuki Hirano<sup>22</sup>, Toshimitsu Hamasaki<sup>1</sup>, Hiroshi Yamagami<sup>1</sup>, Takehiko Nagao<sup>13</sup>, Shinichi Yoshimura<sup>26</sup>, Shinichiro Uchiyama<sup>2</sup>; **Statistical analysis:** Toshimitsu Hamasaki<sup>23</sup>; **Central administrative office:** Office for “RELAXED”, Japan Cardiovascular Research Foundation; **Data center:** EPS corporation.

<sup>1</sup> Departments of Cerebrovascular Medicine and Data Science, National Cerebral and Cardiovascular Center, Suita, Japan.

<sup>2</sup> International University of Health and Welfare Director, Center for Brain and Cerebral Vessels, Sanno Hospital and Sanno Medical Center, Tokyo, Japan.

<sup>3</sup> Department of Cerebrovascular Medicine and Neurology, Clinical Research Institute, National Hospital Organization Kyushu Medical Center, Fukuoka, Japan.

<sup>4</sup> Department of Neurology, National Hospital Organization Nagoya Medical Center, Nagoya, Japan.

<sup>5</sup> Department of Stroke Medicine, Kawasaki Medical School, Kurashiki, Japan.

<sup>6</sup> Department of Neurology and Cerebrovascular Medicine, Saitama International Medical Center, Saitama Medical University, Hidaka, Japan.

<sup>7</sup> Division of Neurology and Gerontology, Department of Internal Medicine, Iwate Medical University, Iwate, Japan.

<sup>8</sup> Department of Neurology, Kumamoto City Hospital, Kumamoto, Japan.

<sup>9</sup> Division of Neurology, Department of Internal Medicine, St. Marianna University School of Medicine, Kawasaki, Japan.

<sup>10</sup> Department of Neurosurgery Graduate School of Medicine, Hokkaido University, Sapporo, Japan.

<sup>11</sup> Department of Clinical Neuroscience and Therapeutics, Hiroshima University Graduate School of Biomedical and Health Sciences, Hiroshima, Japan.

<sup>12</sup> Department of Neurology, Tokyo Women's Medical University, Tokyo, Japan.

<sup>13</sup> Department of Neurology, Nippon Medical School, Tama-Nagayama Hospital, Tokyo, Japan.

<sup>14</sup> Department of Behavioral Neurology and Neuropsychiatry, United Graduate School of Child Development, Osaka University, Suita, Japan.

<sup>15</sup> Department of Behavioral Neurology and Cognitive Neuroscience, Tohoku University School of Medicine, Sendai, Japan.

<sup>16</sup> Department of Neurology, Yokohama General Hospital, Yokohama, Japan.

<sup>17</sup> Department of Neurology, Tokai University Hachioji Hospital, Tokyo, Japan.

<sup>18</sup> Department of Regeneration of Community Medicine, Ehime University Graduate School of Medicine, Ehime, Japan.

<sup>19</sup> Department of Cardiovascular Medicine, Kyoto University Graduate School of Medicine, Kyoto, Japan.

<sup>20</sup> Department of Cardiovascular Medicine, Kobe City Medical Center General Hospital, Kobe, Japan.

<sup>21</sup> Division of Cardiology, Saiseikai Kumamoto Hospital Cardiovascular Center, Kumamoto, Japan.

<sup>22</sup> Department of Stroke and Cerebrovascular Medicine, Kyorin University, Tokyo, Japan.

<sup>23</sup> Department of Radiology, Iwate Medical University, Iwate, Japan.

<sup>24</sup> Department of Diagnostic and Interventional Radiology, Hokkaido University Hospital, Sapporo, Japan.

<sup>25</sup> Department of Radiology, Faculty of Medicine, University of Miyazaki, Miyazaki, Japan.

<sup>26</sup> Department of Neurosurgery, Hyogo College of Medicine, Hyogo, Japan.

The authors also thank Keyra Martinez Dunn, MD and Hikari Chiba, of Edanz Medical Writing, Japan for providing medical writing support which was funded by Bayer Yakuhin Ltd through EPS Holdings in accordance with Good Publication Practice (GPP3) guidelines (<http://www.ismpp.org/gpp3>).

## Author Contributions

**Conceptualization:** Masahiro Yasaka, Kazuo Minematsu, Kazunori Toyoda, Etsuro Mori, Shinichiro Uchiyama.

**Data curation:** Masahiro Yasaka, Kazunori Toyoda, Etsuro Mori, Teruyuki Hirano, Toshimitsu Hamasaki, Hiroshi Yamagami, Takehiko Nagao.

**Formal analysis:** Masahiro Yasaka, Toshimitsu Hamasaki.

**Investigation:** Masahiro Yasaka, Kazunori Toyoda, Etsuro Mori, Teruyuki Hirano, Hiroshi Yamagami, Takehiko Nagao, Shinichi Yoshimura, Shinichiro Uchiyama.

**Methodology:** Masahiro Yasaka, Kazuo Minematsu, Kazunori Toyoda, Etsuro Mori, Teruyuki Hirano, Takehiko Nagao, Shinichi Yoshimura, Shinichiro Uchiyama.

**Project administration:** Kazuo Minematsu, Etsuro Mori.

**Software:** Teruyuki Hirano.

**Supervision:** Kazuo Minematsu, Etsuro Mori, Toshimitsu Hamasaki, Shinichi Yoshimura, Shinichiro Uchiyama.

**Validation:** Teruyuki Hirano, Toshimitsu Hamasaki, Hiroshi Yamagami, Takehiko Nagao.

**Writing – original draft:** Masahiro Yasaka.

**Writing – review & editing:** Kazuo Minematsu, Kazunori Toyoda, Etsuro Mori, Teruyuki Hirano, Toshimitsu Hamasaki, Hiroshi Yamagami, Takehiko Nagao, Shinichi Yoshimura, Shinichiro Uchiyama.

## References

1. Whiteley WN, Adams HP Jr, Bath PM, Berge E, Sandset PM, Dennis M, et al. Targeted use of heparin, heparinoids, or low-molecular-weight heparin to improve outcome after acute ischaemic stroke: an individual patient data meta-analysis of randomized controlled trials. *Lancet Neurol*. 2013; 12: 539–545. [https://doi.org/10.1016/S1474-4422\(13\)70079-6](https://doi.org/10.1016/S1474-4422(13)70079-6) PMID: 23642343
2. Paciaroni M, Agnelli G, Micheli S, Caso V. Efficacy and safety of anticoagulant treatment in acute cardioembolic stroke: a meta-analysis of randomized controlled trials. *Stroke*. 2007; 38: 423–430. <https://doi.org/10.1161/01.STR.0000254600.92975.1f> PMID: 17204681

3. Azoulay L, Dell’Aniello S, Simon TA, Renoux C, Suissa S. Initiation of warfarin in patients with atrial fibrillation: early effects on ischaemic strokes. *Eur Heart J*. 2014; 35: 1881–1887. <https://doi.org/10.1093/eurheartj/eh4499> PMID: 24353282
4. Man-Son-Hing M, Laupacis A. Anticoagulant-related bleeding in older persons with atrial fibrillation: physicians’ fears often unfounded. *Arch Intern Med*. 2003; 163: 1580–1586. <https://doi.org/10.1001/archinte.163.13.1580> PMID: 12860581
5. Patel MR, Mahaffey KW, Garg J, Pan G, Singer DE, Hacke W, et al. Rivaroxaban versus warfarin in nonvalvular atrial fibrillation. *N Engl J Med*. 2011; 365: 883–891. <https://doi.org/10.1056/NEJMoa1009638> PMID: 21830957
6. Hori M, Matsumoto M, Tanahashi N, Momomura S, Uchiyama S, Goto S, et al. Rivaroxaban vs. warfarin in Japanese patients with atrial fibrillation—the J-ROCKET AF study. *Circ J*. 2012; 76: 2104–2111. PMID: 22664783
7. Hemphill JC 3rd, Greenberg SM, Anderson CS, Anderson CS, Becker K, Bendok BR, et al. Guidelines for the management of spontaneous intracerebral hemorrhage: a guideline for healthcare professionals from the American Heart Association/American Stroke Association. *Stroke*. 2015; 46: 2032–2060. <https://doi.org/10.1161/STR.000000000000069> PMID: 26022637
8. Steffel J, Verhamme P, Potpara TS, Albaladejo P, Antz M, Desteghe L, et al. The 2018 European Heart Rhythm Association Practical Guide on the use of non-vitamin K antagonist oral anticoagulants in patients with atrial fibrillation. *Eur Heart J*. 2018; 39: 1330–1393. <https://doi.org/10.1093/eurheartj/ehy136> PMID: 29562325
9. Yasaka M, Minematsu K, Toyoda K, Yamagami H, Yoshimura S, Nagao T, et al. Design and Rationale of the RELAXED (Recurrent Embolism Lessened by rivaroxaban, an Anti-Xa agent, of Early Dosing for acute ischemic stroke and transient ischemic attack with atrial fibrillation) Study. *J Stroke Cerebrovasc Dis*. 2016; 25: 1342–1348. <https://doi.org/10.1016/j.jstrokecerebrovasdis.2016.01.035> PMID: 26987488
10. Schulman S, Kearon C; Subcommittee on Control of Anticoagulation of the Scientific and Standardization Committee of the International Society on Thrombosis and Haemostasis. Definition of major bleeding in clinical investigations of antithrombotic medicinal products in non-surgical patients. *J Thromb Haemost*. 2005; 3: 692–694. <https://doi.org/10.1111/j.1538-7836.2005.01204.x> PMID: 15842354
11. Larrue V, von Kummer R R, Müller A, Bluhmki E. Risk factors for severe hemorrhagic transformation in ischemic stroke patients treated with recombinant tissue plasminogen activator: a secondary analysis of the European-Australasian Acute Stroke Study (ECASS II). *Stroke*. 2001; 32: 438–441. PMID: 11157179
12. Seiffge DJ, Traenka C, Polymeris A, Hert L, Peters N, Lyrer P, et al. Early start of DOAC after ischemic stroke: Risk of intracranial hemorrhage and recurrent events. *Neurology*. 2016; 87: 1856–1862. <https://doi.org/10.1212/WNL.0000000000003283> PMID: 27694266
13. Toyoda K, Arihiro S, Todo K, Yamagami H, Kimura K, Furui E, et al. Trends in oral anticoagulant choice for acute stroke patients with nonvalvular atrial fibrillation in Japan: the SAMURAI-NVAF study. *Int J Stroke*. 2015; 10: 836–842. <https://doi.org/10.1111/ijvs.12452> PMID: 25581108
14. Hong KS, Kwon SU, Lee SH, Lee JS, Kim YJ, Song TJ, et al. Rivaroxaban vs warfarin sodium in the ultra-early period after atrial fibrillation-related mild ischemic stroke: a randomized clinical trial. *JAMA Neurol*. 2017; 74: 1206–1215. <https://doi.org/10.1001/jamaneurol.2017.2161> PMID: 28892526
15. Arihiro S, Todo K, Koga M, Furui E, Kinoshita N, Kimura K, et al. Three-month risk-benefit profile of anticoagulation after stroke with atrial fibrillation: The SAMURAI-Nonvalvular Atrial Fibrillation (NVAF) study. *Int J Stroke*. 2016; 11: 565–574. <https://doi.org/10.1177/1747493016632239> PMID: 26927811
16. Yasaka M, Lip GY. Impact of non-vitamin k antagonist oral anticoagulants on intracranial bleeding in Asian patients with non-valvular atrial fibrillation. *Circ J*. 2014; 78: 2367–2372. PMID: 25213003
17. Yasaka M, Lip GY. Stroke prevention in Asian patients with atrial fibrillation. *Stroke*. 2014; 45: 1608–1609. <https://doi.org/10.1161/STROKEAHA.114.005339> PMID: 24763932
18. Komori M, Yasaka M, Kokuba K, Matsuoka H, Fujimoto S, Yoshida M, et al. Intracranial hemorrhage during dabigatran treatment. *Circ J*. 2014; 78: 1335–1341. PMID: 24662438
19. Paciaroni M, Agnelli G, Falocci N, Tsvigoulis G, Vadikolias K, Liantinioti C, et al. Early recurrence and major bleeding in patients with acute ischemic stroke and atrial fibrillation treated with non-vitamin-K oral anticoagulants (RAF-NOACs) Study. *J Am Heart Assoc*. 2017; 6(12): pii: e007034.
20. Tanigawa T, Kaneko M, Hashizume K, et al. Model-based dose selection for phase III rivaroxaban study in Japanese patients with non-valvular atrial fibrillation. *Drug Metab Pharmacokinet* 2013; 28: 59–70. PMID: 22813718
21. Nakagawara J, Minematsu K, Okada Y, Tanahashi N, Nagahiro S, Mori E, et al.: Thrombolysis with 0.6 mg/kg intravenous alteplase for acute ischemic stroke in routine clinical practice: the Japan post-

- Marketing Alteplase Registration Study (J-MARS). *Stroke*. 2010; 41:1984–1989 <https://doi.org/10.1161/STROKEAHA.110.589606> PMID: 20651262
22. National Institute of Neurological Disorders and Stroke rt-PA Stroke Study Group: Tissue plasminogen activator for acute ischemic stroke. *N Engl J Med*. 1995; 333:1581–1587. <https://doi.org/10.1056/NEJM199512143332401> PMID: 7477192
  23. Wahlgren N, Ahmed N, Dávalos A, Ford GA, Grond M, Hacke W, et al.: Thrombolysis with alteplase for acute ischaemic stroke in the Safe Implementation of Thrombolysis in Stroke-Monitoring Study (SITS-MOST): an observational study. *Lancet*. 2007; 369:275–282. [https://doi.org/10.1016/S0140-6736\(07\)60149-4](https://doi.org/10.1016/S0140-6736(07)60149-4) PMID: 17258667
